# Supplementary material for: Unusual Reactivities of ortho-Hydroxy-β-nitrostyrene
Source: MDPI journal article supplement (doi:10.3390/molecules27154804), 2022-07-27

## Supporting Information

### (*E*)-2-(2-Hydroxyphenyl)-1-nitroethene (1b)

$^1\text{H}$  NMR (400 MHz,  $\text{CDCl}_3$ )

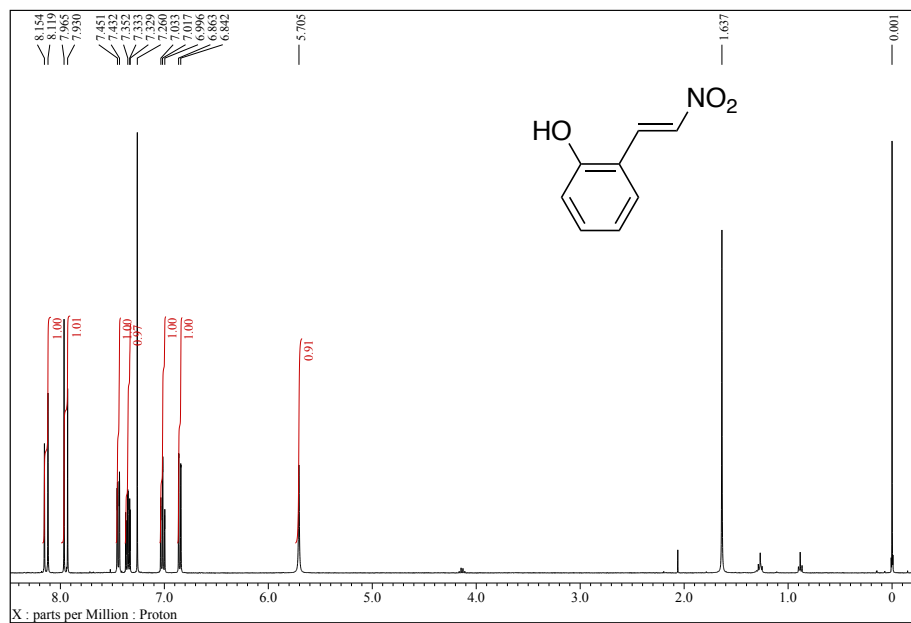

$^{13}\text{C}$  NMR (100 MHz,  $\text{CDCl}_3$ )

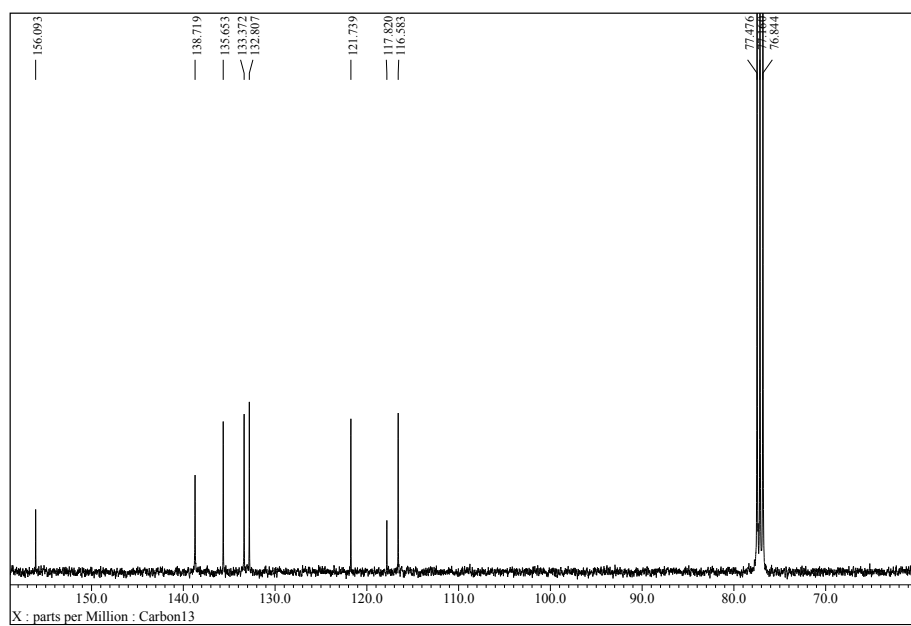

**(E)-2-(2-Acetoxyphenyl)-1-nitroethene (1c)**

$^1\text{H}$  NMR (400 MHz,  $\text{CDCl}_3$ )

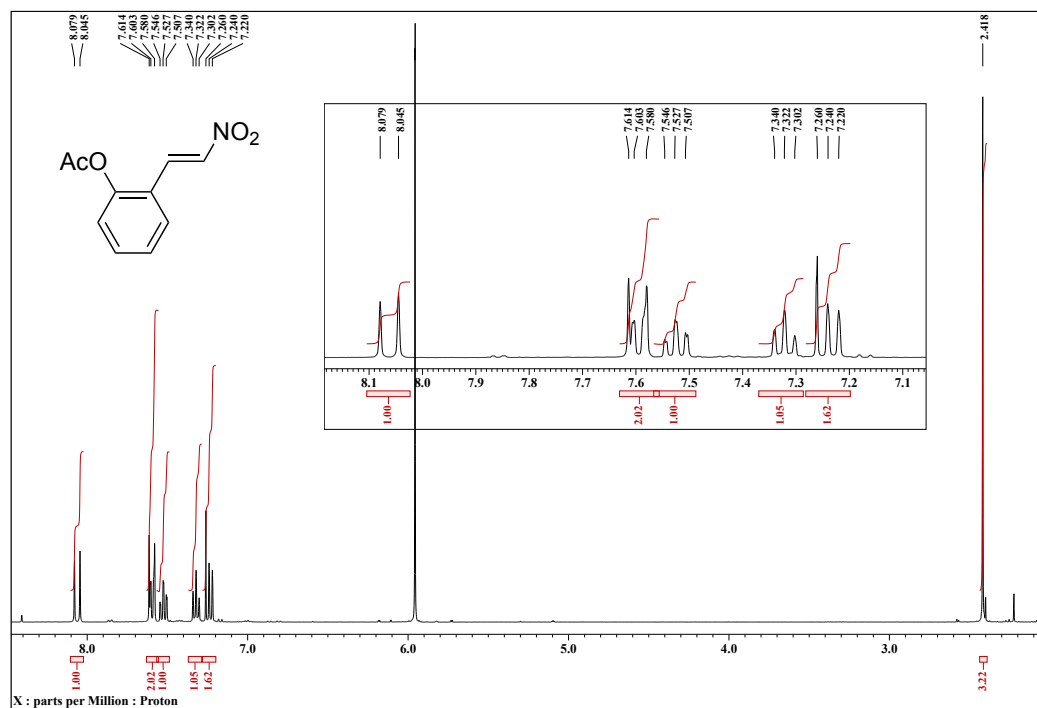

$^{13}\text{C}$  NMR (100 MHz,  $\text{CDCl}_3$ )

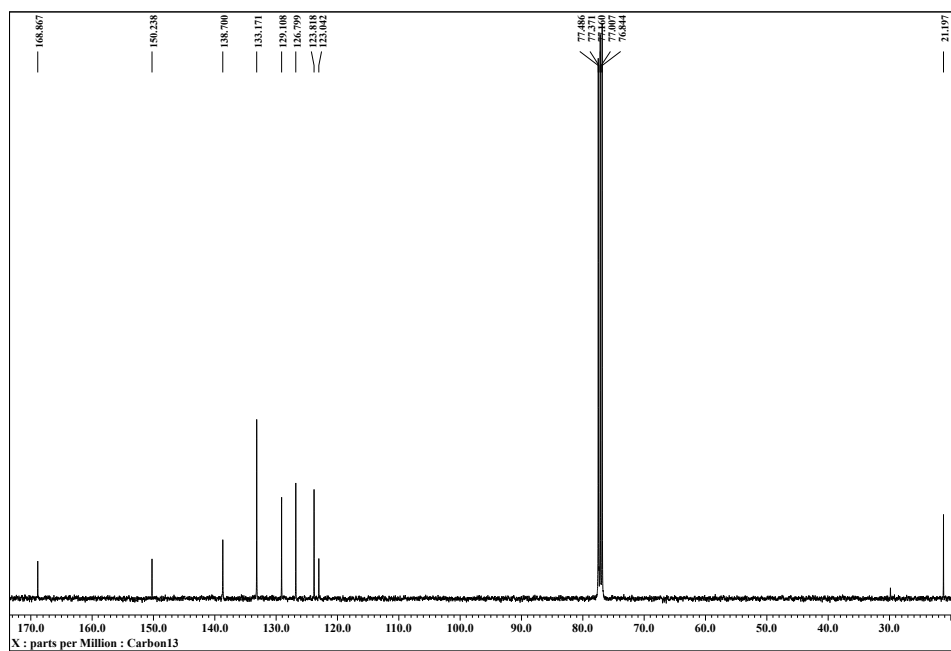

$^1\text{H}$  NMR spectra of the reaction mixture after conjugate addition of propylamine to nitrostyrene **1**

In the case of **1b** (400 MHz,  $\text{CDCl}_3$ )

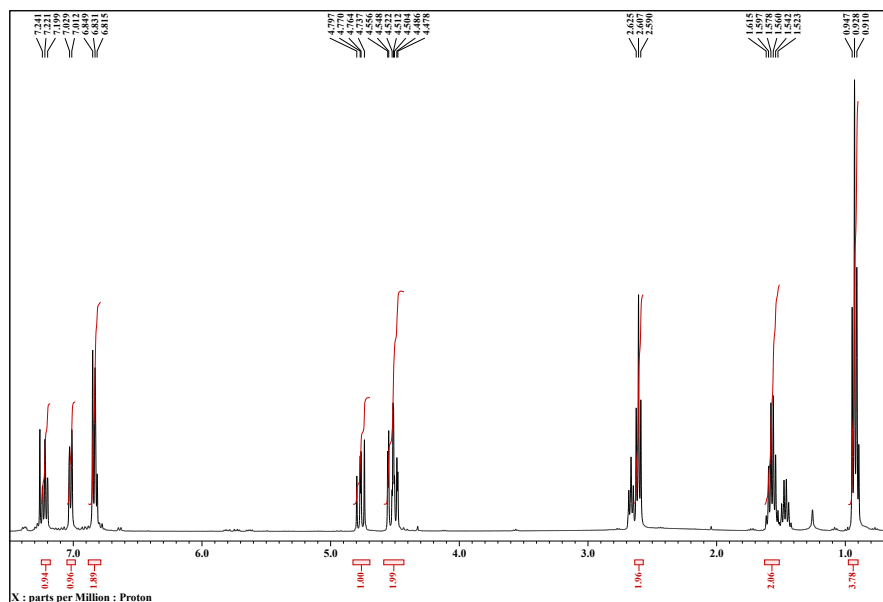

In the case of **1c** (400 MHz,  $\text{CDCl}_3$ )

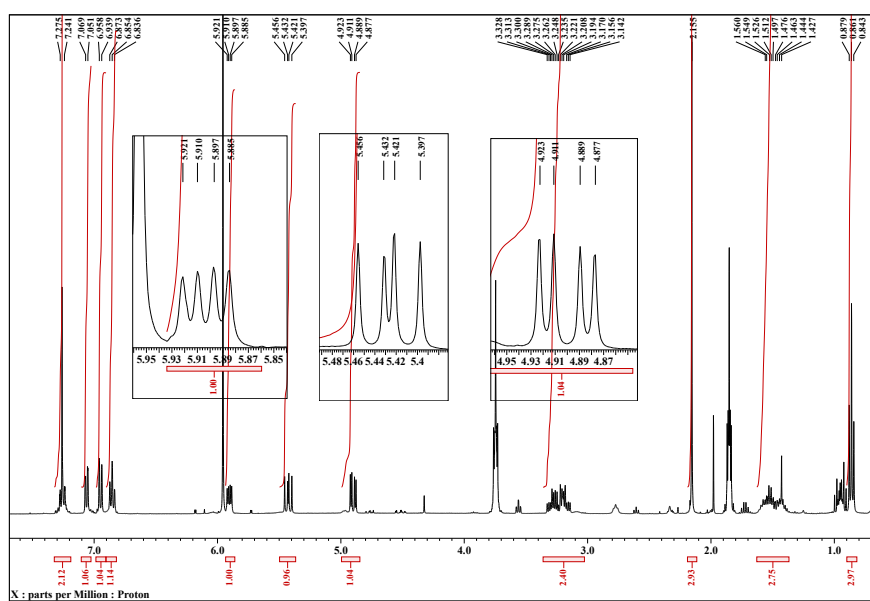

## <sup>1</sup>H NMR spectrum of the reaction mixture after *N*-chlorination of adduct 2b

<sup>1</sup>H NMR (400 MHz, CDCl<sub>3</sub>)

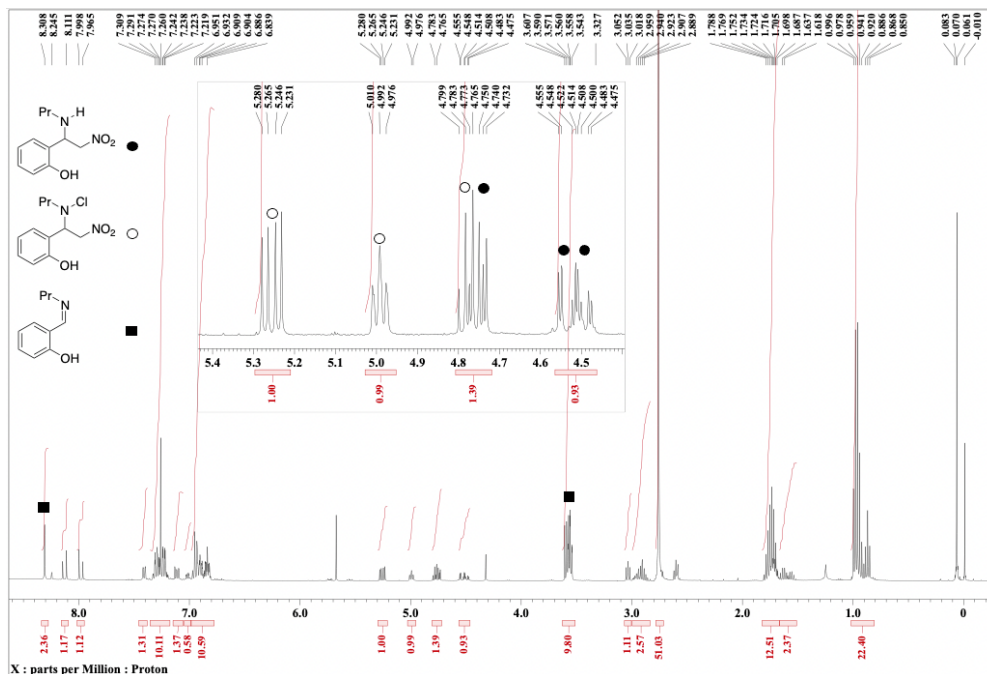

## <sup>1</sup>H NMR spectra of the reaction mixture after UV irradiation to nitrostyrenes 1

In the case of **1a**, <sup>1</sup>H NMR (400 MHz, CDCl<sub>3</sub>)

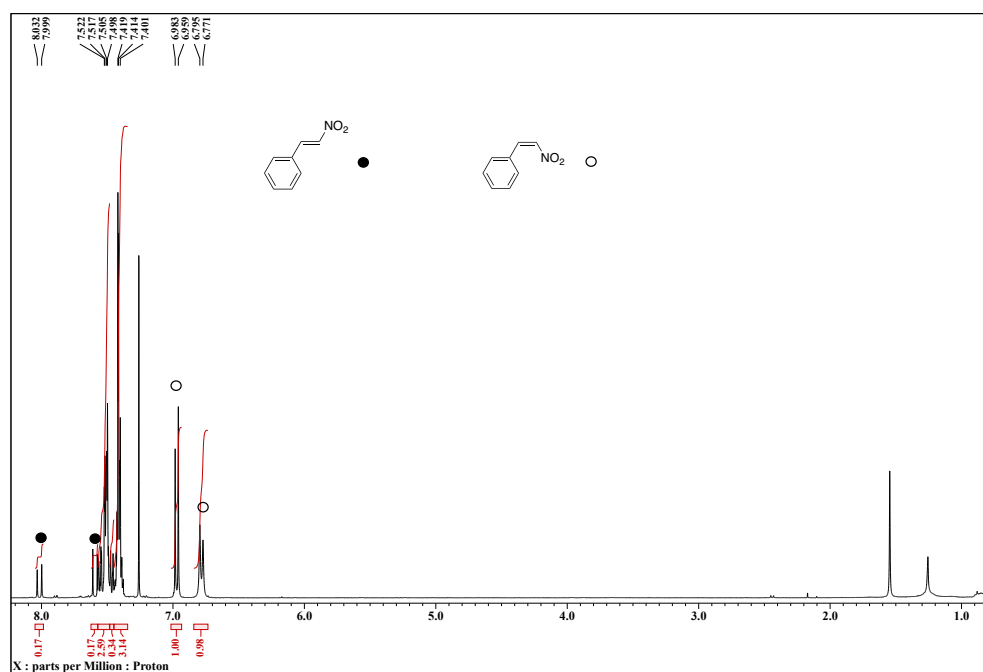

In the case of **1b**,  $^1\text{H}$  NMR (400 MHz,  $\text{CDCl}_3$ )

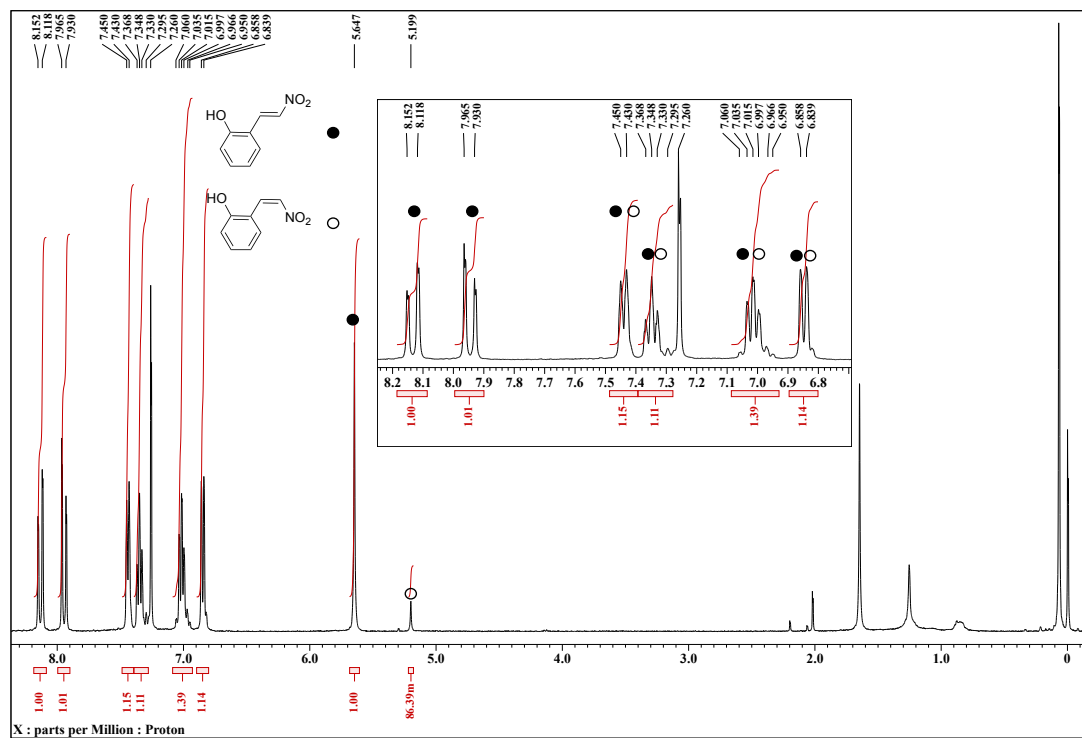

In the case of **1c**,  $^1\text{H}$  NMR (400 MHz,  $\text{CDCl}_3$ )

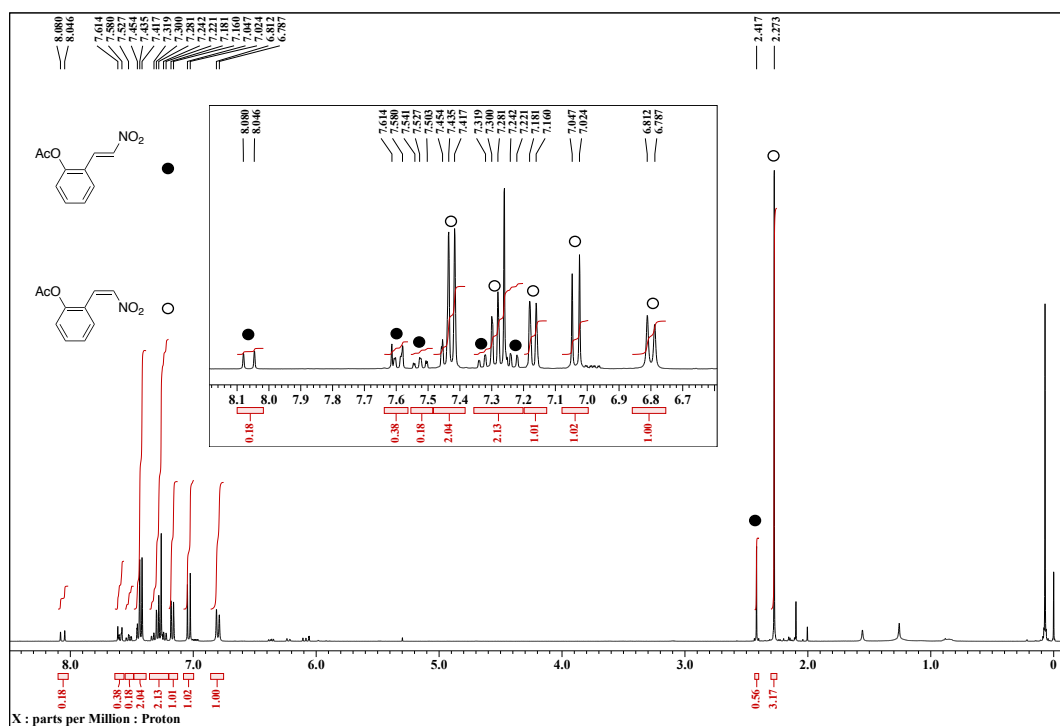

**3,4-*trans*-4,5-*cis*-2-(4-Chlorophenyl)-3,5-diphenyl-4-nitroisoxazolidine (8a)**

<sup>1</sup>H NMR (400 MHz, CDCl<sub>3</sub>)

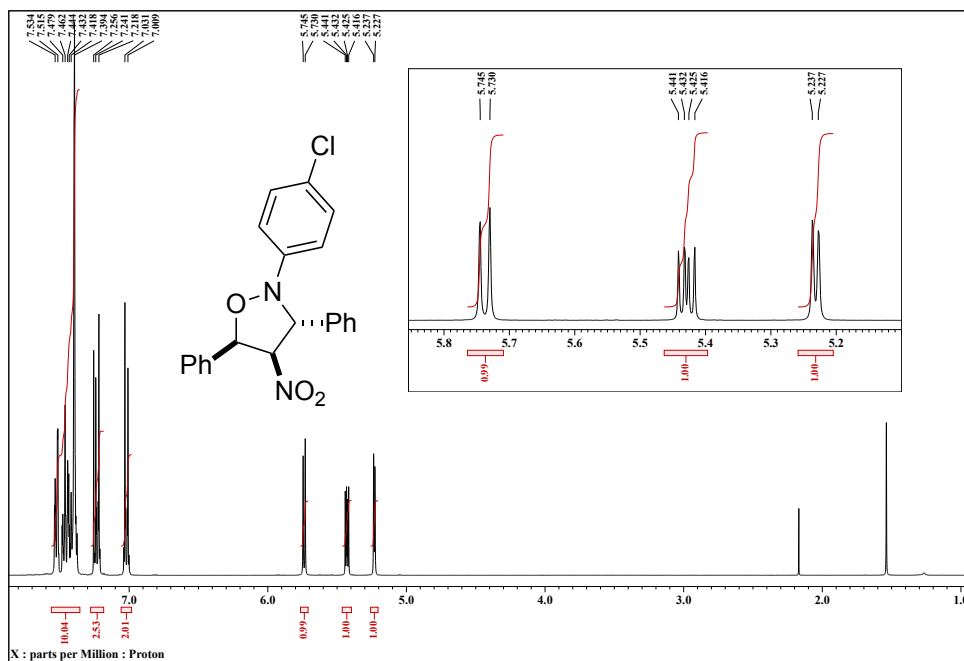

<sup>13</sup>C NMR (100 MHz, CDCl<sub>3</sub>)

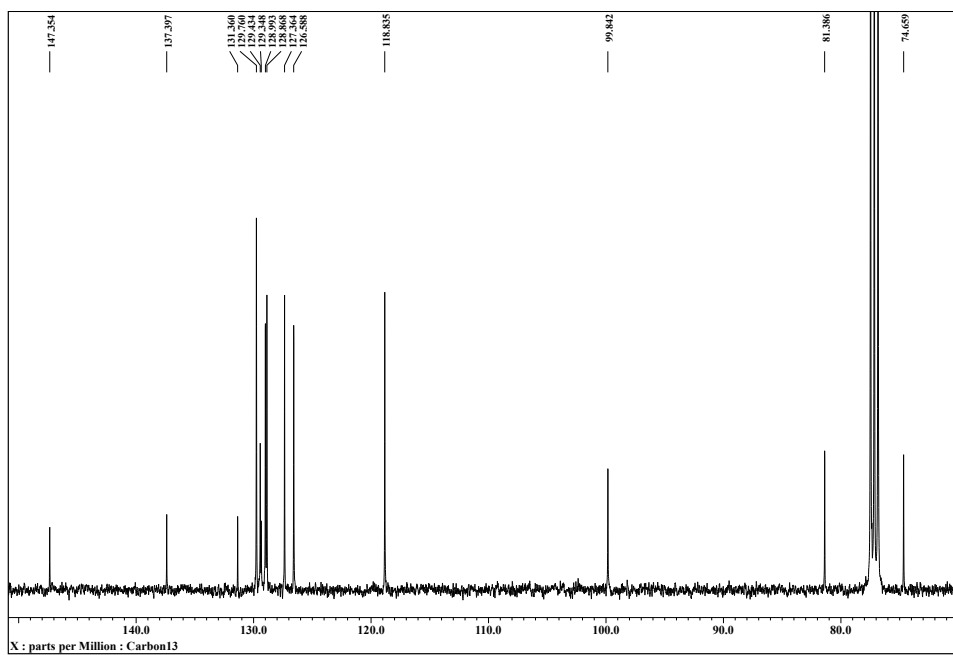

**$^1\text{H}$  NMR spectra of the reaction mixture after 1,3-dipolar cycloaddition of 1c with nitrone 6**

$^1\text{H}$  NMR (400 MHz,  $\text{CDCl}_3$ )

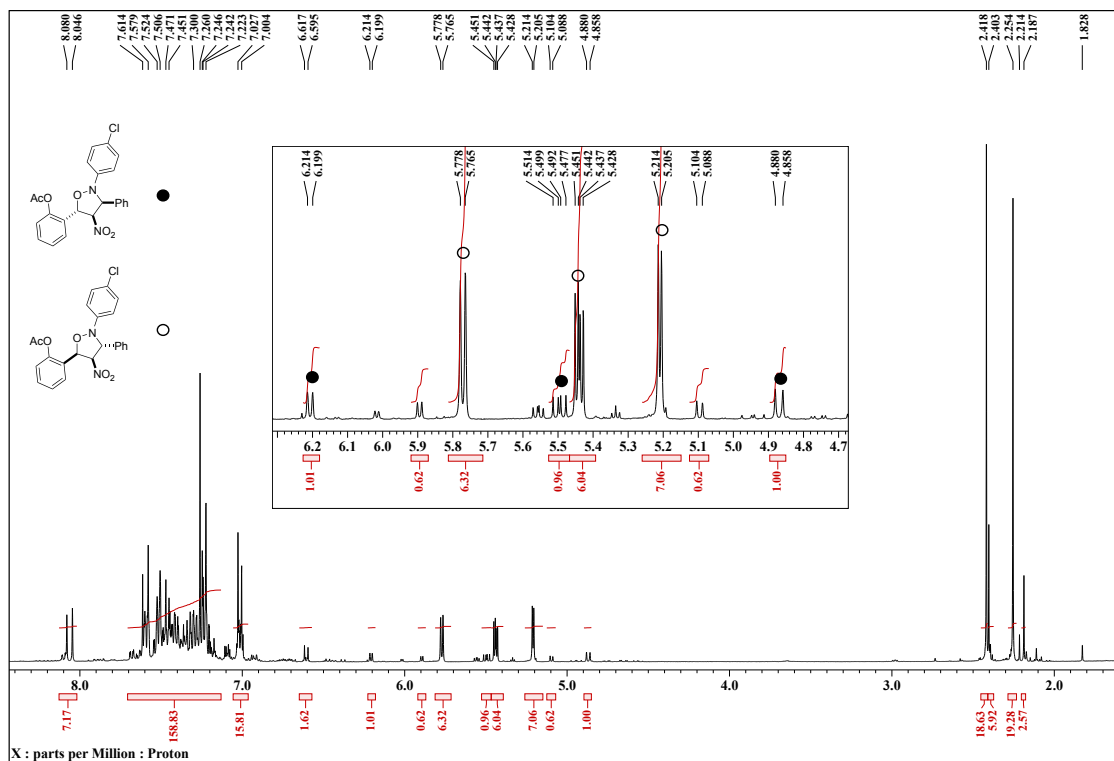

Supplement: s1 [file s1]
